# Supplementary material for: Regulating the reorganization energy and crystal packing of small-molecule donors enables the high performance of binary all-small-molecule organic solar cells with a slow film growth rate
Source: Royal Society of Chemistry journal article supplement (doi:10.1039/d3ee02129g), 2023-01-01
Supplement: d3ee02129g1.pdf [file d3ee02129g1.pdf]

# **Regulating Reorganization Energy and Crystal Packing of Small-Molecule Donors Enables High Performance Binary All-Small-Molecule Organic Solar Cells with Slow Film Growth Rate**

Tongle Xu,<sup>a,1</sup> Jie Lv,<sup>b,1</sup> Daming Zheng,<sup>c,1</sup> Zhenghui Luo,<sup>\*a</sup> Min Hun Jee,<sup>d</sup> Guangliu Ran,<sup>e</sup> Zhanxiang Chen,<sup>a</sup> Zhongyan Huang,<sup>a</sup> Jiaqi Ren,<sup>f</sup> Yuxiang Li,<sup>f</sup> Cai'e Zhang,<sup>a</sup> Hanlin Hu,<sup>\*b</sup> Thierry Pauporté,<sup>c</sup> Wenkai Zhang,<sup>\*c</sup> Han Young Woo,<sup>\*d</sup> and Chuluo Yang<sup>\*a</sup>

<sup>a</sup>T. Xu, Z. Luo, Z. Chen, Z. Huang, C. Zhang, C. Yang  
Shenzhen Key Laboratory of New Information Display and Storage Materials, College of Materials Science and Engineering, Shenzhen University, Shenzhen 518060, China.  
E-mail: zhhuiluo@szu.edu.cn; clyang@szu.edu.cn.

<sup>b</sup>J. Lv, H. Hu  
Hoffmann Institute of Advanced Materials, Shenzhen Polytechnic, 7098 Liuxian Boulevard, Shenzhen 518055, China. E-mail: hanlinhu@szpt.edu.cn.

<sup>c</sup>D. Zheng, T. Pauporté  
Chimie ParisTech, Université PSL, CNRS, Institut de Recherche de Chimie Paris (IRCP), UMR8247, 11 rue P. et M. Curie, F-75005, Paris, France.

<sup>d</sup>M. H. Jee, H. Y. Woo  
Department of Chemistry, College of Science, Korea University, Seoul 136-713, Republic of Korea.  
E-mail: hywoo@korea.ac.kr.

<sup>e</sup>G. Ran, W. Zhang  
Department of Physics and Applied Optics Beijing Area Major Laboratory, Beijing Normal University, Beijing 100875, China. E-mail: wkzhang@bnu.edu.cn.

<sup>f</sup>J. Ren, Y. Li  
School of Materials Science and Engineering, Xi'an University of Science and Technology, Xi'an 710054, China.

<sup>1</sup>T. Xu, J. Lv and D. Zheng contributed equally to this work.

## Device Fabrication and Testing

Organic solar cells were prepared with regular structure: ITO/PEDOT:PSS/Active layer/ PDINN /Ag. Cleaning and retreatment of patterned ITO can be found elsewhere. PEDOT:PSS was diluted with the same volume of water, a thin layer of PEDOT:PSS (~20 nm) (Clevios Al 4083) was spin-coated onto the UV-treated substrates followed by thermal treatment on a hot plate at 150 °C for 15 min. Then, the HTL-covered samples were transferred into a nitrogen-filled glovebox for active layer deposition. The optimized overall concentration were 23 mg·ml<sup>-1</sup> chloroform solution with feed ratio of 1.5:1 (w/w) for donors:Y6, respectively. Note: The as-prepared solutions were stirred at 40°C temperature for 2 hours before being spin-coated. The active layers were spin-coated at an optimized speed of 2500 rpm for 30s, resulting in films of 100 to 120 nm in thickness. The active layers were then treated by CB solvent vapor annealing (SVA), after that, thermal treatment under different temperature was further conducted to optimize the active layer. Then, PDINN solution (2 mg/ml in isopropyl alcohol) was spin-coated on with 3000 rpm for 20s. Finally, these cells were transferred into a thermal evaporation chamber with a base pressure below  $1 \times 10^{-6}$  torr, and 100 nm of Ag was deposited with a deposition rate of 0.1-0.2 nm s<sup>-1</sup>. The active area was 0.1 cm<sup>2</sup>.

The current density-voltage ( $J$ - $V$ ) curves of devices were recorded under AM 1.5G illumination provided by an AAA class solar simulator (Enli Technology Co., Ltd. SS-X50R) calibrated by a silicon reference cell with KG1 filter (supported from Enli Tech. Co., Ltd., Taiwan). The external quantum efficiency (EQE) was measured by a certified incident photon to electron conversion (IPCE) equipment (QE-R) from Enli Technology Co., Lt. The light intensity at each wavelength was calibrated using a standard monocrystalline Si photovoltaic cell. The parasitic absorption was obtained from the transfer matrix model.

## SCLC Mobility Measurements

Fitting the hole/electron-only diode dark current to the space charge limited current (SCLC) model can obtain the hole and electron mobility of the photosensitive active layer. The electron-only device structure was ITO/ZnO/ PDINN / Active layer / PDINN

/Ag, and the hole-only device structure was ITO/PEDOT:PSS/ Active layer /MoO<sub>3</sub>/Ag. Using the following equation to estimate the electric-field dependent SCLC mobility:

$$J(V) = \frac{9}{8} \epsilon_0 \epsilon_r \mu_0 \exp\left(0.89\beta \sqrt{\frac{V - V_{bi}}{L}}\right) \frac{(V - V_{bi})^2}{L^3} \quad (1)$$

For the hole-only device structure,  $V_{bi} = 0$  V (flat band pattern formed by PEDOT:PSS-MoO<sub>3</sub>); For the electron-only device structure,  $V_{bi} = 0.5$  V was used following the protocol reported<sup>1</sup>.

### **The functioning of a GD-OES equipment**

In this technique, a low-pressure glow discharge plasma is generated. The sample material is polarized negatively and acts as a cathode. The cations in the plasma are accelerated toward the sample surface and kicks-out the surface atoms. This bombardment process, referred to as sputtering, ablates the sample in the direction perpendicular to the surface. The released analyte atoms are then promoted to an excited state by energy transfers from the plasma. While they return to their ground state, they emit light forming a glow. The emitted wavelengths are atom specific, and the sample composition is deduced from the real-time analysis by optical emission spectroscopy of the emitted spectrum (Figure S7a).

### ***Characterizations and Measurements***

GD-OES analysis was performed using a HORIBA Jobin Yvon GD Profiler 2 apparatus. The instrument was equipped with a RF-generator (13.56 MHz), a standard HORIBA Jobin Yvon glow discharge source, cylindrical anodes with an inner diameter of 4 mm, and two optical spectrometers (one polychromatic and one monochromator) for rapid optical detection. The argon plasma was generated at an argon pressure of 420 Pa and the applied power was 10 W. The organic film was mounted on an O-ring on one side of the plasma chamber, which acts as a cathode. The analyzed perovskite film area was a disk 4 mm in diameter.

## Materials

All reagents and solvents, unless otherwise specified, were purchased from Energy Chemical, Organtec.Ltd, JiangSu GE-Chem Biotech.,Ltd. All reagents were used as recieved without further purification. The intermediate **1b** is synthesized according to the previous literature report<sup>2</sup>, **1a** is obtained in exactly the same way as **1b** and will not be repeated here. All reactions were heated by metal sand bath (WATTCAS, LAB-500, <https://www.wattcas.com>).

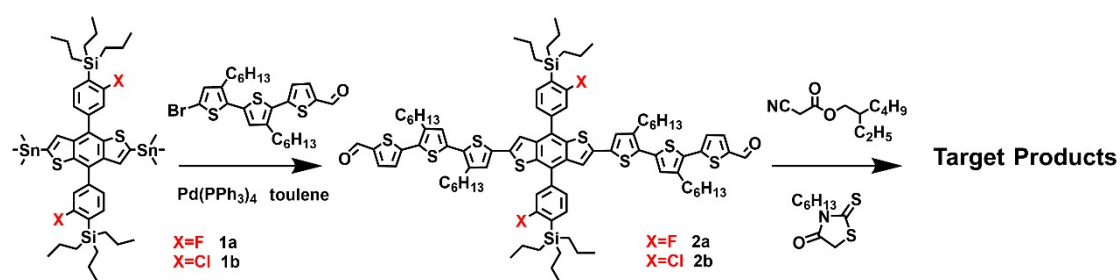

**Scheme S1.** Synthetic route of **T25**, **T26** and **T27**.

**Synthesis of compound 2a:** In a pre-dried Schlenk tube, Compound **1a** (500 mg, 0.49 mmol), **2** (618 mg, 1.18 mmol) and  $Pd(PPh_3)_4$  (50 mg) were dissolved with degassed toluene (30 mL). The mixture was heated at 130 °C for 24 h. The reaction mixture was allowed to cool down to room temperature, the organic layer was washed with brine, extracted with dichloromethane (3×40 mL), dried with anhydrous  $Na_2SO_4$ , and then concentrated under reduced pressure. The crude product was purified by column chromatography over silica gel using a mixture of chloroform and hexane (4:1) as the eluent to afford orange solid (543g, 70%).  $^1H$  NMR (400 MHz, Chloroform- $d$ )  $\delta$  9.88 (s, 2H), 7.71 (d,  $J$  = 4.0 Hz, 2H), 7.61 (dd,  $J$  = 7.5, 5.7 Hz, 2H), 7.48 (dd,  $J$  = 7.5, 1.5

Hz, 2H), 7.37-7.34 (dd,  $J = 7.5, 1.5$  Hz, 2H), 7.34 (s, 2H), 7.23 (d,  $J = 4.0$  Hz, 2H), 7.11 (s, 2H), 7.02 (s, 2H), 2.83-2.74 (m, 10H), 1.52-1.39 (m, 22H), 1.33-1.30 (m, 14H), 1.08-1.03 (m, 20H), 0.99-0.95 (m, 12H), 0.91-0.87 (m, 12H).  $^{13}\text{C}$  NMR (101 MHz,  $\text{CDCl}_3$ )  $\delta$  182.53, 166.49, 146.00, 142.57, 142.24, 141.22, 137.83, 137.77, 136.88, 136.84, 135.85, 135.29, 130.56, 129.60, 129.15, 128.83, 128.62, 125.87, 124.67, 118.40, 115.60, 31.66, 30.40, 30.22, 29.80, 29.67, 29.27, 22.62, 18.63, 17.54, 15.42, 15.38, 14.10.

Synthesis of compound **2b**: The synthetic route is similar to that of compound **2a**, except for replacing **1a** with **1b**.  $^1\text{H}$  NMR (400 MHz, Chloroform- $d$ )  $\delta$  9.89 (s, 2H), 7.70 (dd,  $J = 5.0, 2.8$  Hz, 4H), 7.65 (d,  $J = 7.6$  Hz, 2H), 7.56 (dd,  $J = 7.6, 1.6$  Hz, 2H), 7.31 (s, 2H), 7.23 (d,  $J = 4.0$  Hz, 2H), 7.12 (s, 2H), 7.02 (s, 2H), 2.83-2.74 (m, 8H), 1.75-1.60 (m, 10H), 1.54-1.40 (m, 22H), 1.34-1.30 (m, 14H), 1.08-1.02 (m, 32H), 0.91-0.86 (m, 12H).  $^{13}\text{C}$  NMR (101 MHz,  $\text{CDCl}_3$ )  $\delta$  182.47, 145.97, 142.53, 142.20, 141.80, 141.16, 140.87, 137.87, 137.83, 137.45, 137.16, 136.89, 136.81, 135.83, 135.21, 130.61, 129.72, 129.60, 129.11, 128.63, 126.67, 125.82, 118.26, 31.67, 30.39, 30.22, 29.81, 29.69, 29.30, 22.64, 18.68, 17.69, 15.45, 14.12.

Synthesis of compound **T25**: Compound **2a** (140 mg, 0.09 mmol) and cyanoacetic acid esters (175 mg, 0.9 mmol) were added dissolved in chloroform (30 mL), then 2mL triethylamine added and resulting solution was heated to reflux and stirred overnight. The reaction mixture was concentrated under reduced pressure and by silica gel chromatography using a mixture of chlorform and hexane (4:1) as eluent to afford **T4** as black solid (160 mg, 92%).  $^1\text{H}$  NMR (400 MHz, Chloroform- $d$ )  $\delta$  8.24 (s, 2H), 7.76

(d, J = 4.1 Hz, 2H), 7.62 (t, J = 6.7 Hz, 2H), 7.48 (d, J = 7.6 Hz, 2H), 7.38-7.33 (m, 4H), 7.23 (d, J = 3.9 Hz, 2H), 7.11 (d, J = 2.0 Hz, 2H), 7.02 (d, J = 2.0 Hz, 2H), 4.21 (d, J = 5.8 Hz, 4H), 2.83 (t, J = 7.9 Hz, 4H), 2.77 (t, J = 8.0 Hz, 4H), 1.73-1.64 (m, 12H), 1.42-1.30 (m, 40H), 1.09-1.03 (m, 22H), 0.98-0.87 (m, 42H). <sup>13</sup>C NMR (101 MHz, CDCl<sub>3</sub>) δ 166.48, 163.20, 146.25, 145.75, 142.95, 141.83, 141.33, 137.89, 137.84, 137.74, 136.88, 136.26, 135.38, 134.84, 130.55, 129.53, 129.28, 128.83, 128.63, 126.12, 124.66, 118.43, 115.99, 115.60, 97.68, 68.78, 38.80, 31.66, 30.34, 30.22, 29.99, 29.70, 29.27, 29.23, 28.93, 23.77, 22.97, 22.61, 18.63, 17.54, 15.42, 14.10, 14.06, 11.03. HRMS (m/z) [M]<sup>+</sup>:1932.8549

Synthesis of compound **T26**: The synthetic route is similar to that of compound **T25**, except for replacing cyanoacetic acid esters with 3-hexylrhodanine. <sup>1</sup>H NMR (600 MHz, Chloroform-d) δ 7.83 (s, 2H), 7.62 (dd, J = 7.5, 5.7 Hz, 2H), 7.48 (dd, J = 7.4, 1.5 Hz, 2H), 7.37-7.34 (m, 4H), 7.33 (s, 2H), 7.20 (d, J = 4.0 Hz, 2H), 7.10 (s, 2H), 7.01 (s, 2H), 4.09 (t, J = 7.7 Hz, 4H), 2.82-2.79 (t, J = 8.0 Hz, 4H), 2.76 (t, J = 8.0 Hz, 4H), 1.72-1.66 (m, 12H), 1.51-1.39 (m, 22H), 1.36-1.30 (m, 26H), 1.07-1.04 (m, 18H), 0.99-0.95 (m, 12H), 0.92-0.87 (m, 18H). <sup>13</sup>C NMR (151 MHz, Chloroform-d) δ 192.11, 168.49, 167.49, 166.89, 144.23, 141.93, 141.70, 141.65, 141.05, 137.81, 137.73, 137.08, 136.87, 136.67, 136.59, 135.49, 135.15, 134.66, 130.71, 129.79, 129.09, 128.75, 128.73, 128.60, 126.48, 124.96, 124.79, 124.69, 124.67, 124.58, 120.19, 118.31, 115.58, 115.39, 44.86, 31.74, 31.70, 31.37, 30.37, 30.30, 29.90, 29.75, 29.38, 29.34, 26.95, 26.50, 22.71, 22.67, 22.60, 22.57, 18.70, 17.58, 15.44, 15.43, 14.19, 14.18, 14.06. HRMS (m/z) [M]<sup>+</sup>:1972.6907

Synthesis of compound **T27**: The synthetic route is similar to that of compound **T26**, except for replacing **2a** with **2b**.  $^1\text{H}$  NMR (400 MHz, Chloroform- $d$ )  $\delta$  7.82 (s, 2H), 7.70 (d,  $J$  = 1.6 Hz, 2H), 7.66 (d,  $J$  = 7.6 Hz, 2H), 7.56 (dd,  $J$  = 7.6, 1.6 Hz, 2H), 7.34 (d,  $J$  = 4.0 Hz, 2H), 7.29 (s, 2H), 7.19 (d,  $J$  = 4.0 Hz, 2H), 7.10 (s, 2H), 7.00 (s, 2H), 4.12-4.06 (t,  $J$  = 7.6 Hz, 4H), 2.82-2.73 (m, 8H), 1.73-1.65 (m, 12H), 1.51-1.42 (m, 18H), 1.36-1.30 (m, 26H), 1.09-1.01 (m, 32H), 0.93-0.85 (m, 20H).  $^{13}\text{C}$  NMR (151 MHz, Chloroform- $d$ )  $\delta$  192.13, 192.07, 167.50, 167.44, 144.23, 141.93, 141.88, 141.79, 141.06, 140.97, 140.87, 137.85, 137.79, 137.74, 137.43, 137.41, 137.16, 137.08, 137.00, 136.88, 136.86, 135.46, 135.45, 135.09, 135.02, 134.67, 134.62, 130.75, 129.80, 129.78, 129.74, 129.12, 129.01, 128.66, 128.61, 128.50, 128.44, 126.68, 126.50, 126.40, 126.36, 124.98, 124.92, 120.20, 120.11, 118.21, 44.87, 44.84, 31.76, 31.75, 31.71, 31.69, 31.37, 30.36, 30.30, 30.28, 29.92, 29.89, 29.79, 29.76, 29.74, 29.40, 29.37, 29.34, 26.95, 26.93, 26.50, 22.73, 22.71, 22.69, 22.68, 22.57, 18.73, 17.71, 15.45, 14.20, 14.07. MALDI-TOFMS ( $m/z$ )  $[\text{M}]^+$ :2008.1576

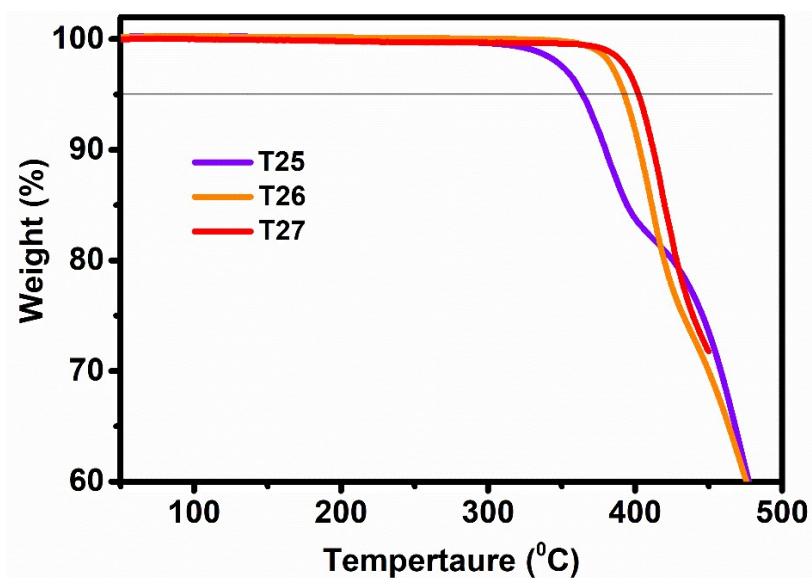

**Figure S1.** Thermogravimetric analysis (TGA) curve of the **T25**, **T26** and **T27**.

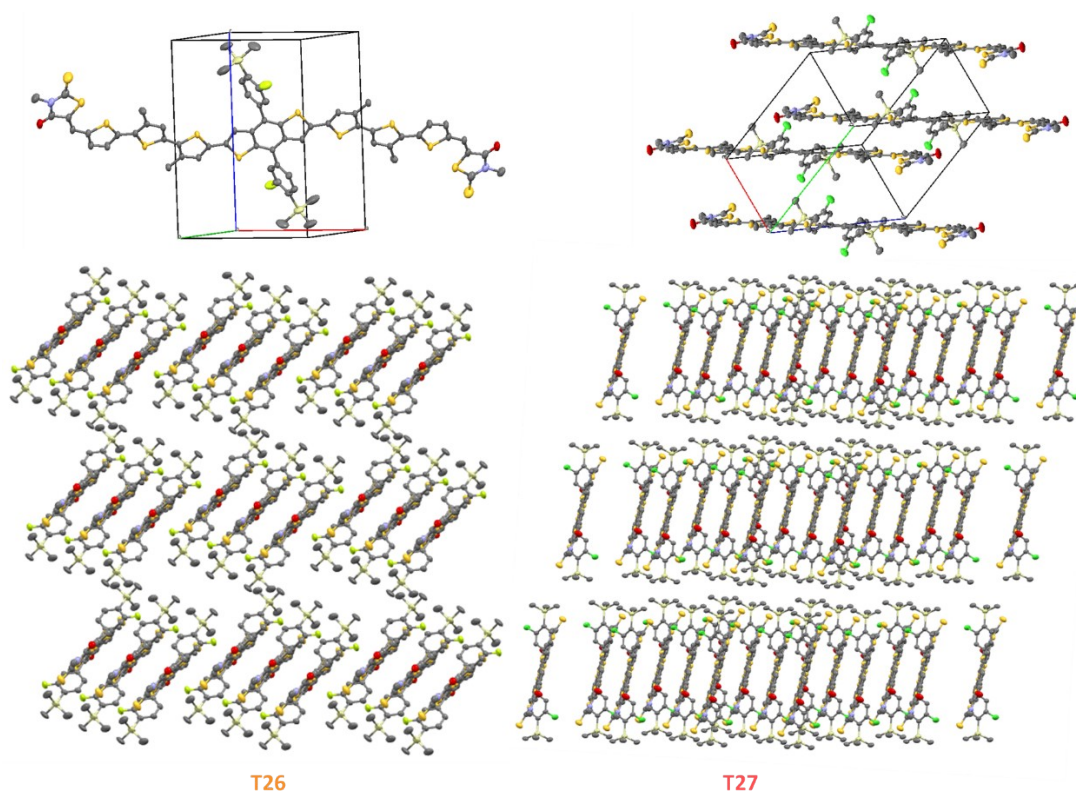

**Figure S2.** The packing images of **T26** and **T27** single crystals.

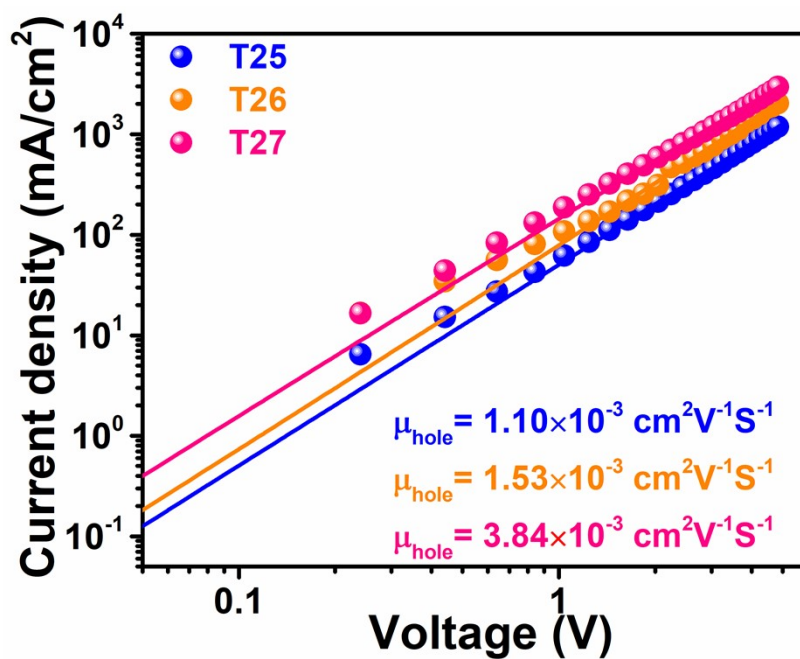

**Figure S3.** The neat film hole mobility of **T25**, **T26** and **T27**



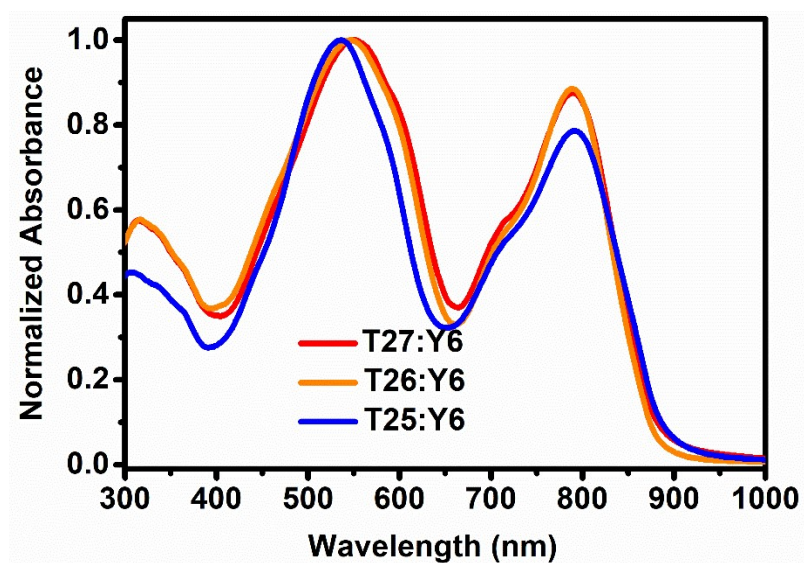

**Figure S4.** Absorption spectra of the blend films of T25:Y6, T26:Y6 and T27:Y6.

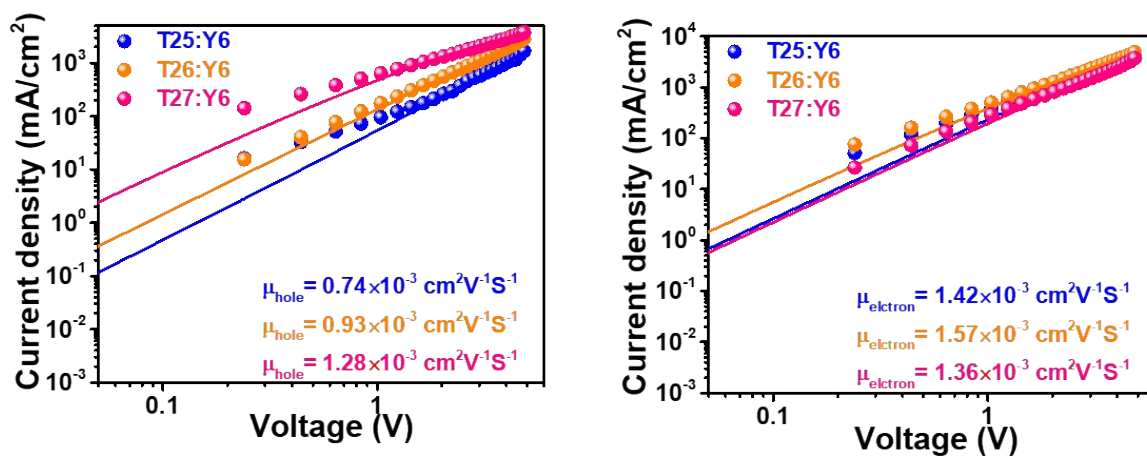

**Figure S5.** SCLC data for (a) electron-only and (b) hole-only devices fabricated by T25:Y6, T26:Y6 and T27:Y6 respectively.

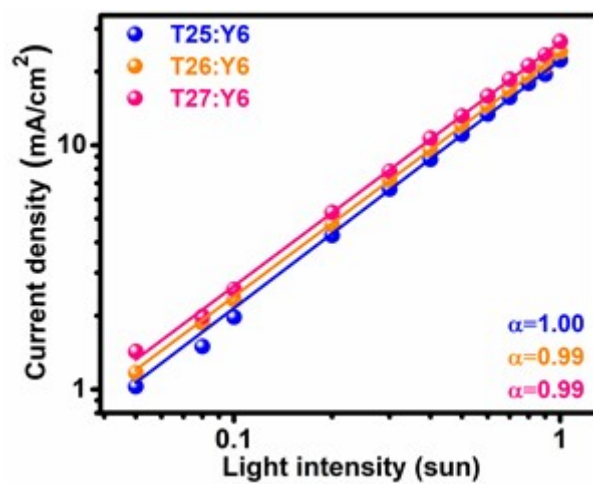

**Figure S6.**  $J_{sc}$  dependence on the light intensity

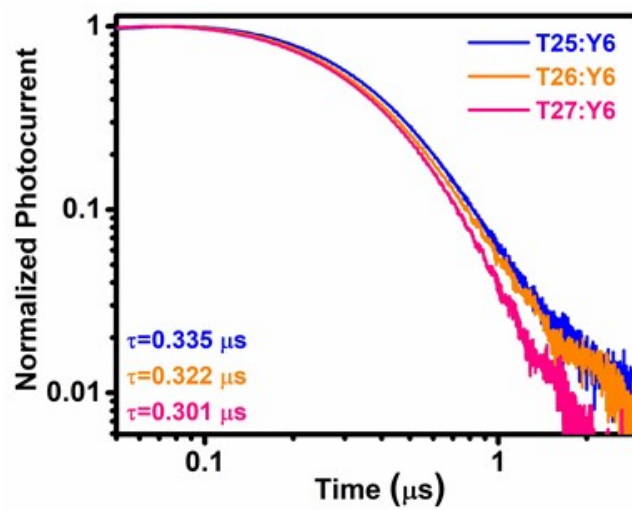

**Figure S7.** Transient photocurrent of the blends.

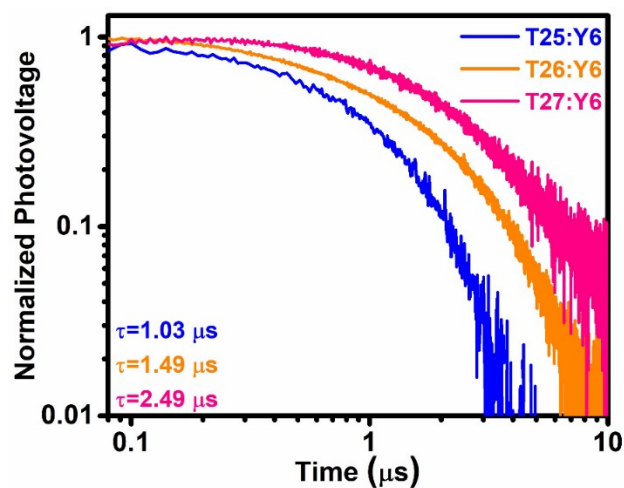

**Figure S8.** Transient photovoltage of the blends.

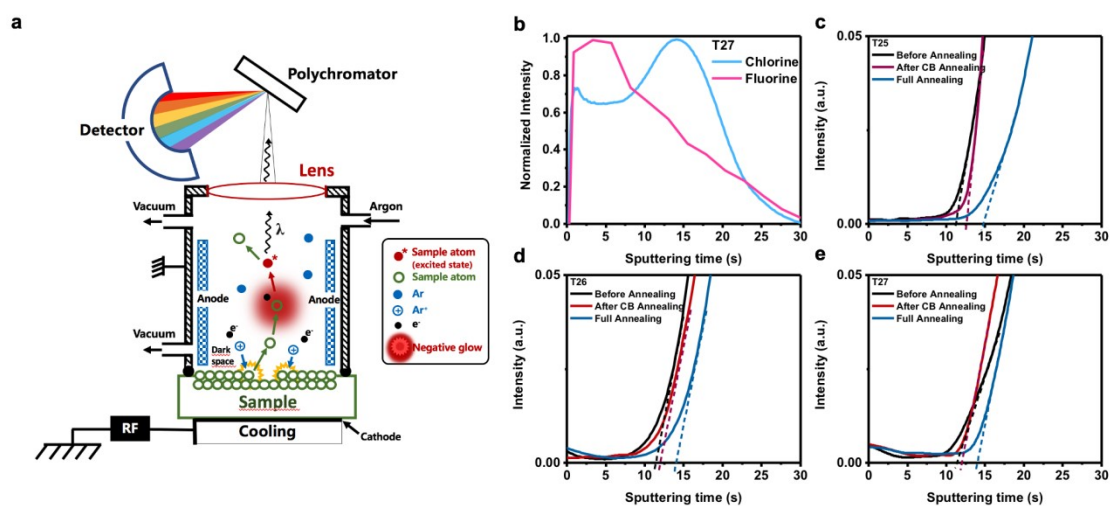

**Figure S9.** (a) Schematic of a GD-OES instrument working principle. (b) The GD-OES depth profile of the fully annealed organic layer of T27:Y6. (d-e) The GD-OES depth profiles of substrate of (b) T25:Y6, (c) T26:Y6, and (d) T27:Y6.

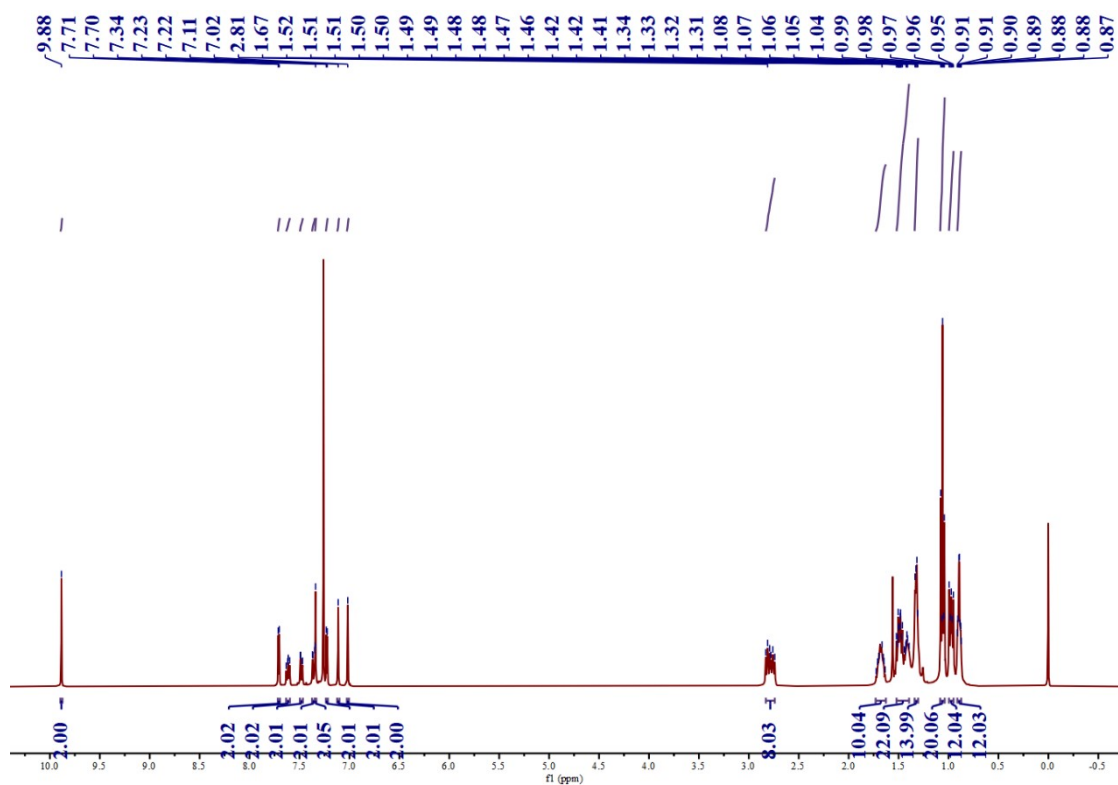

**Figure S10.**  $^1\text{H}$  NMR spectrum of compound 2a in  $\text{CDCl}_3$ .

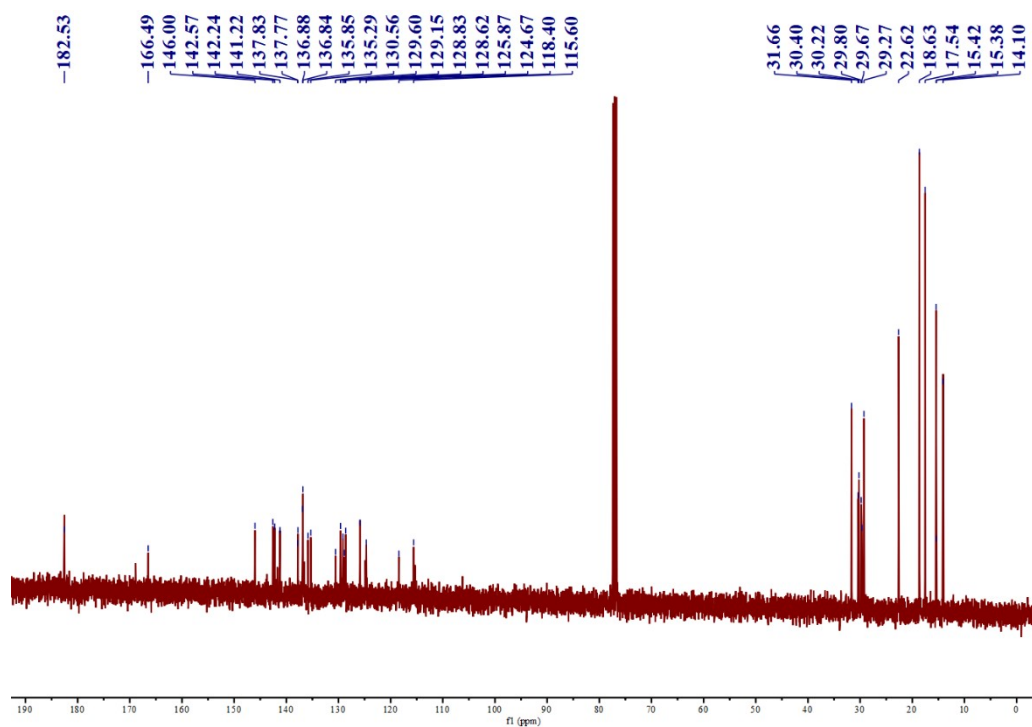

**Figure S11.**  $^{13}\text{C}$  NMR spectrum of compound 2a in  $\text{CDCl}_3$ .

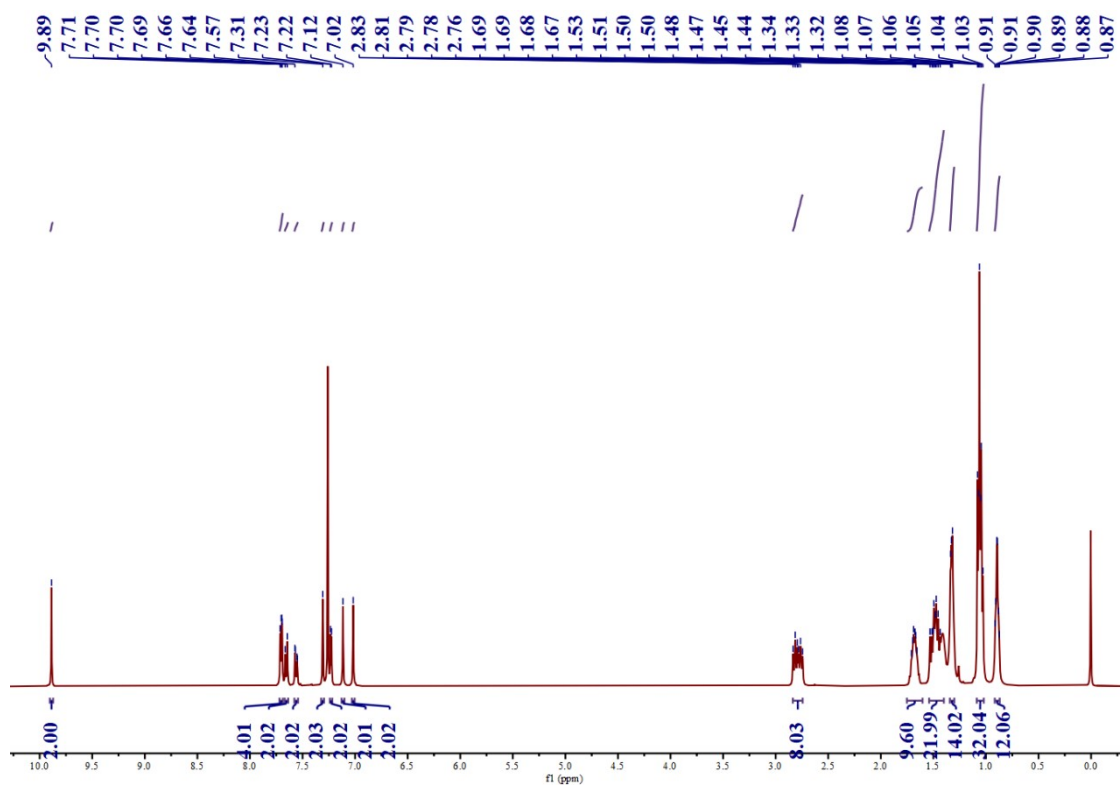

**Figure S12.** <sup>1</sup>H NMR spectrum of compound 2b in CDCl<sub>3</sub>.

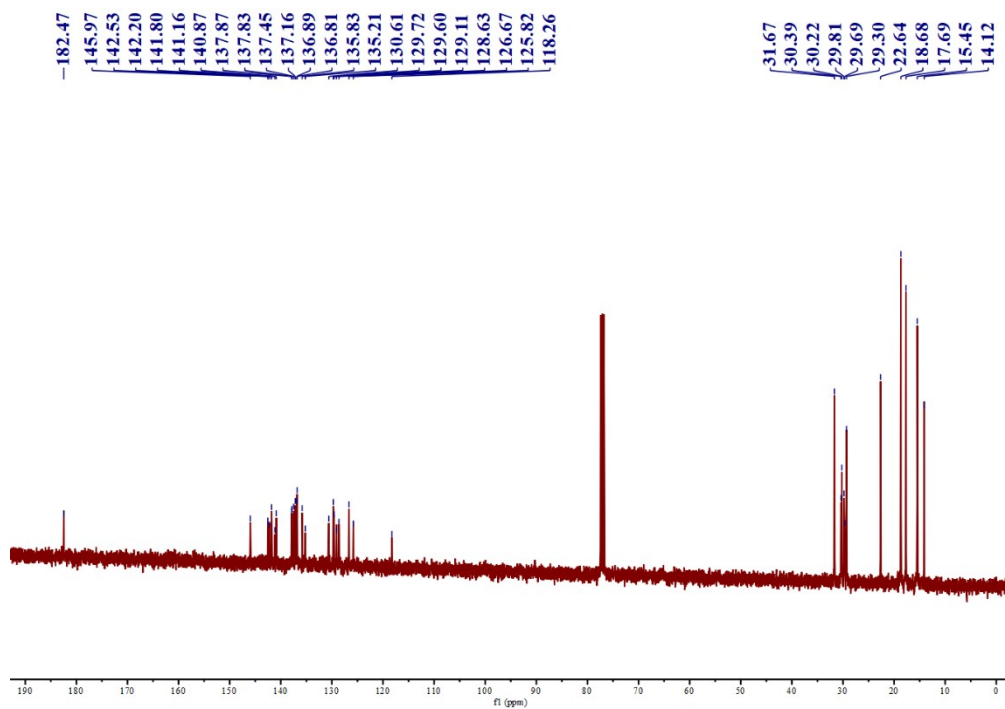

**Figure S13.** <sup>13</sup>C NMR spectrum of compound 2b in CDCl<sub>3</sub>.

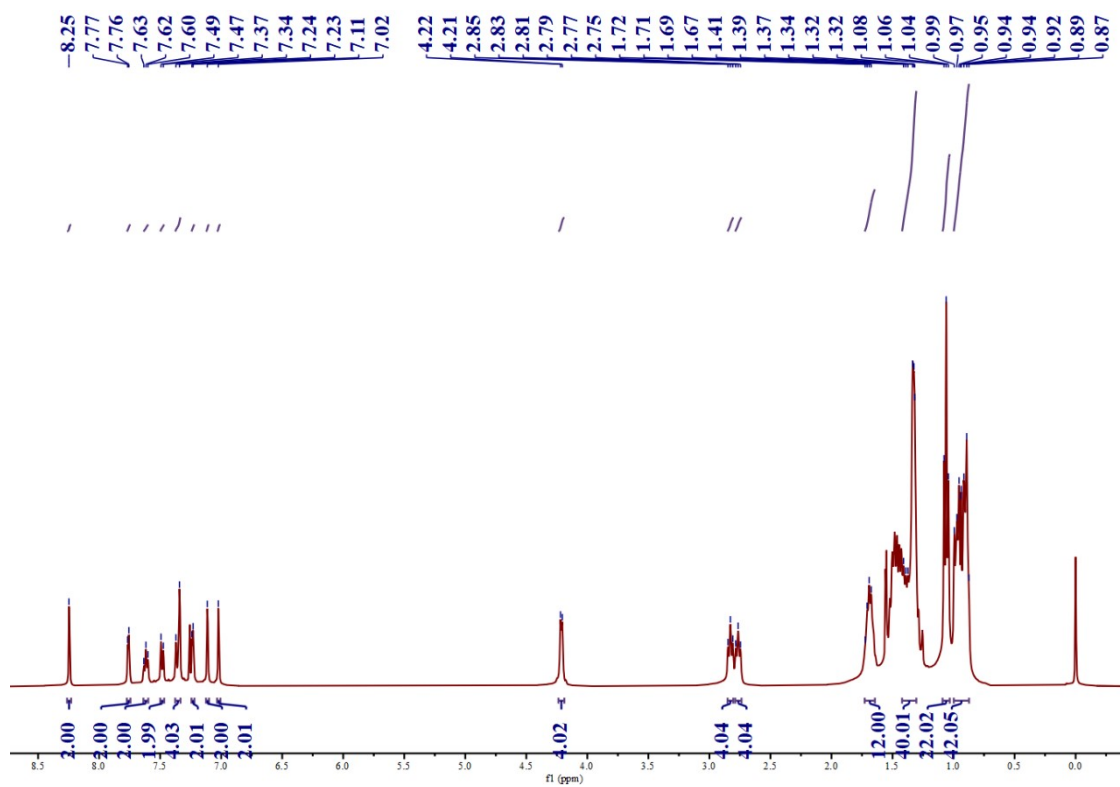

Figure S14. <sup>1</sup>H NMR spectrum of compound T25 in CDCl<sub>3</sub>.

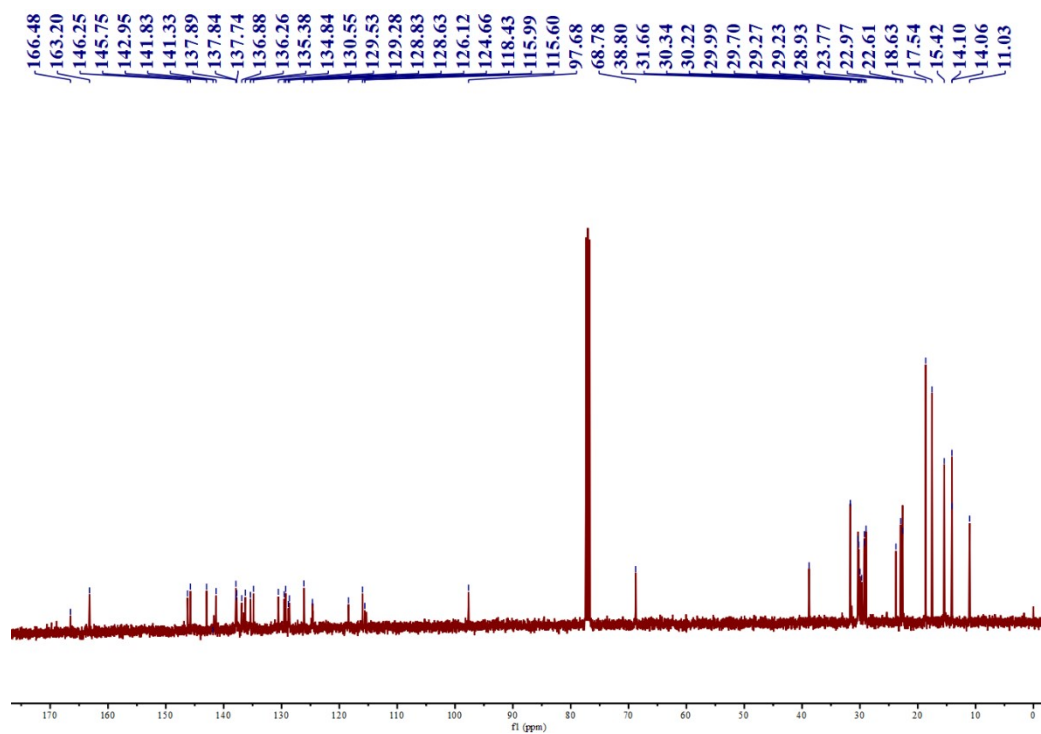

Figure S15. <sup>13</sup>C NMR spectrum of compound T25 in CDCl<sub>3</sub>.

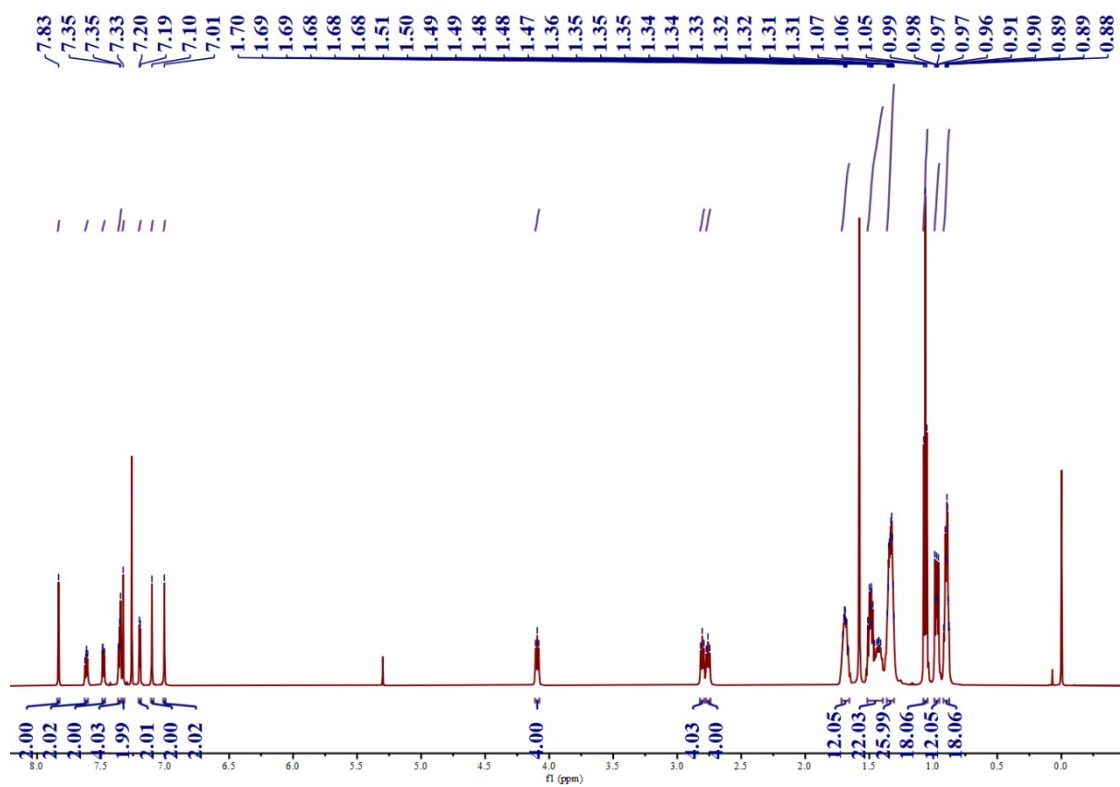

Figure S16. <sup>1</sup>H NMR spectrum of compound T26 in CDCl<sub>3</sub>

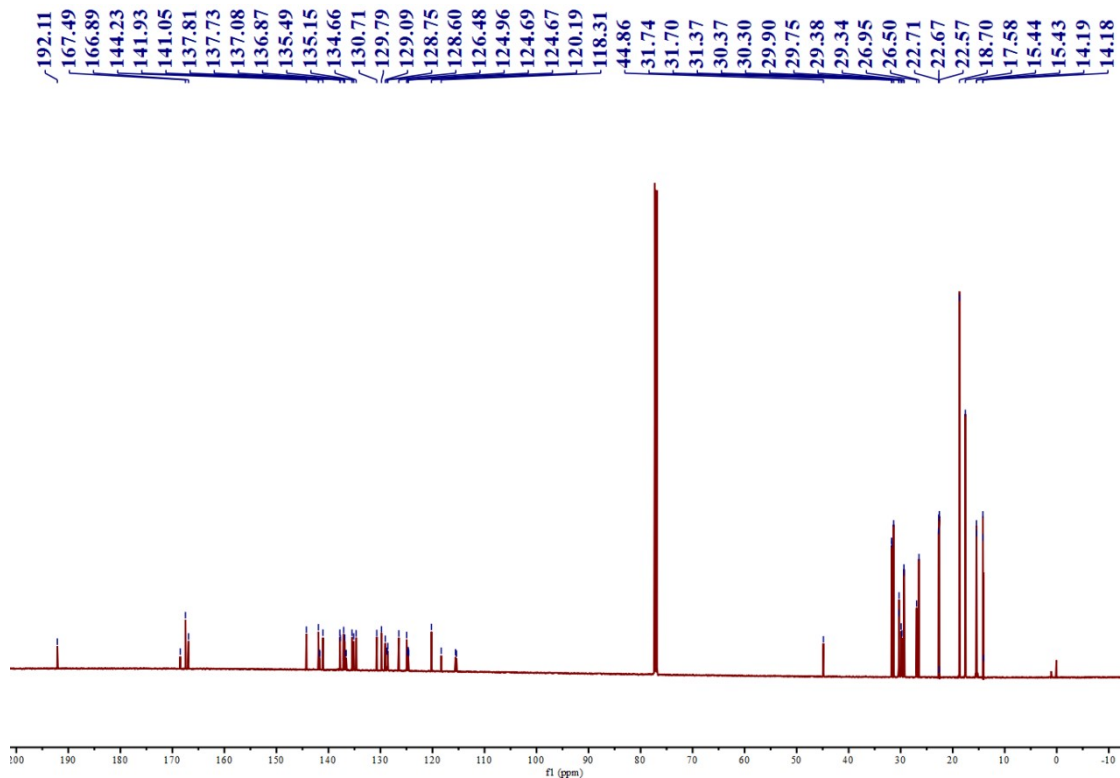

Figure S17. <sup>13</sup>C NMR spectrum of compound T26 in CDCl<sub>3</sub>.



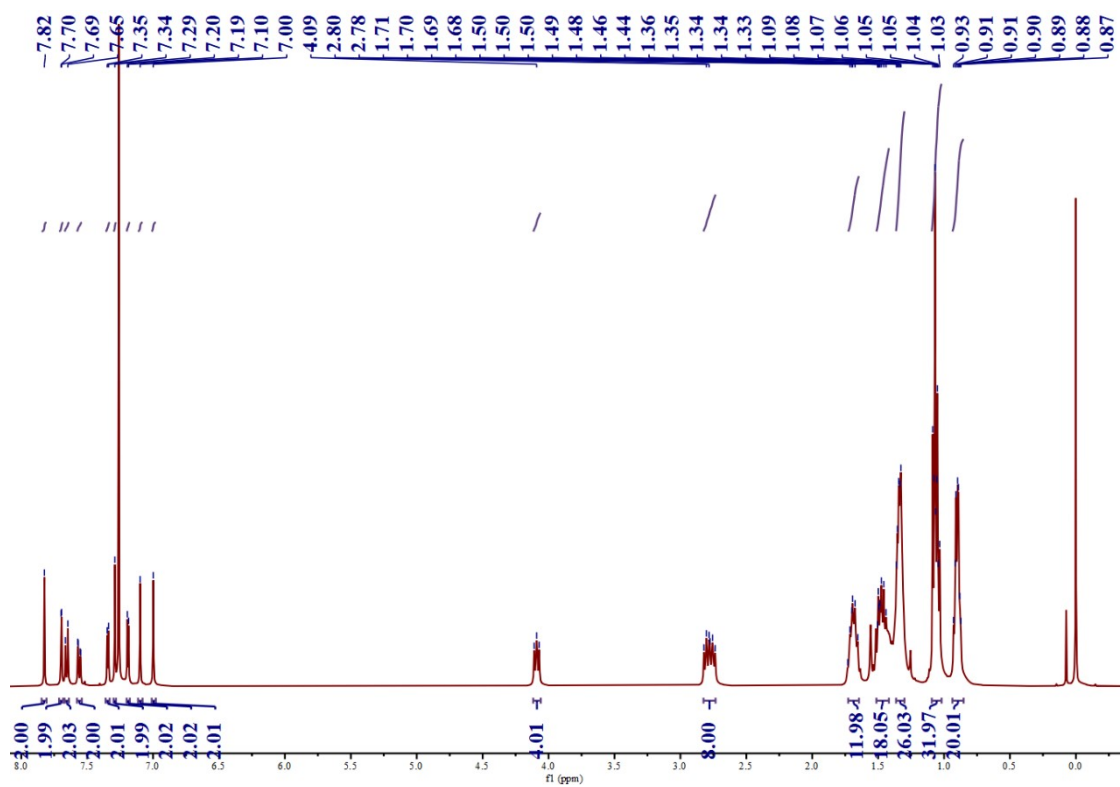

**Figure S18.** <sup>1</sup>H NMR spectrum of compound T27 in CDCl<sub>3</sub>

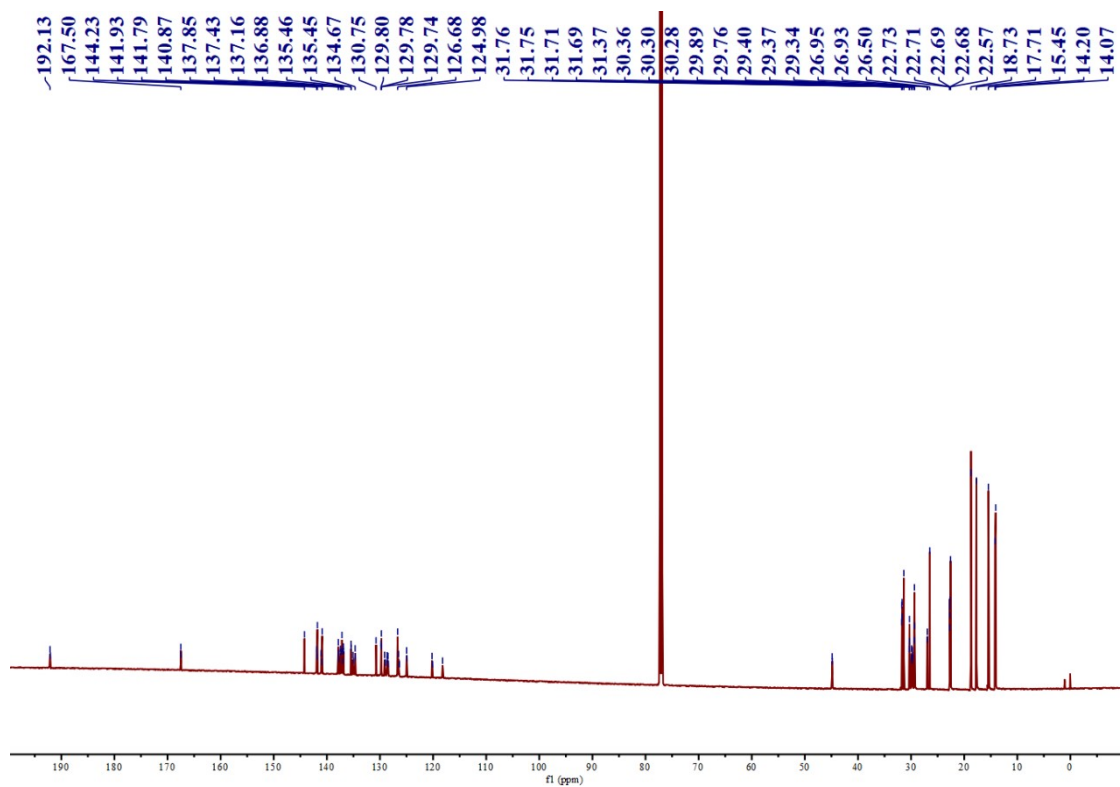

**Figure S19.** <sup>13</sup>C NMR spectrum of compound T27 in CDCl<sub>3</sub>.



**Table S1.** The values of the four-point energy and internal reorganization energy of the three SMDs.

| basename                     |    | T25            | T26            | T27            |
|------------------------------|----|----------------|----------------|----------------|
| scf(a.u.)                    | CN | -6918.91823492 | -8360.91910406 | -9081.52558158 |
|                              | CC | -6918.70369599 | -8360.70646382 | -9081.31261343 |
|                              | NC | -6918.70145218 | -8360.70466270 | -9081.31082215 |
|                              | NN | -6918.92166636 | -8360.92233042 | -9081.52879332 |
| $\lambda_{\text{INT}}$ (meV) |    | 154.43         | 136.80         | 136.14         |

**Table S2.** Photovoltaic data of T27:Y6 solar cells with 1.5:1 ratio under different posttreatment condition. All data were obtained under illumination of AM 1.5G (100mW cm<sup>-2</sup>) light source.

| Condition    | Voc (V) | PCE <sub>max</sub> (%) | FF (%) | Jsc (mA/cm <sup>2</sup> ) |
|--------------|---------|------------------------|--------|---------------------------|
| 100°C, 10min | 0.906   | 6.25                   | 37.66  | 18.30                     |
| 110°C, 10min | 0.887   | 8.53                   | 44.04  | 21.83                     |
| 120°C, 10min | 0.869   | 9.86                   | 48.28  | 23.50                     |
| 130°C, 10min | 0.843   | 9.81                   | 48.73  | 23.85                     |

**Table S3.** Blend film thickness dependence for T27:Y6 solar cells with 1.5:1 ratio under 100°C, 10min. All data were obtained under illumination of AM 1.5G (100mW cm<sup>-2</sup>) light source.

| Speed (rpm) | Voc (V) | PCE <sub>max</sub> (%) | FF (%) | Jsc (mA/cm <sup>2</sup> ) |
|-------------|---------|------------------------|--------|---------------------------|
| 2000        | 0.895   | 5.88                   | 36.14  | 18.19                     |
| 2500        | 0.905   | 6.37                   | 38.18  | 18.39                     |
| 3000        | 0.902   | 6.01                   | 36.83  | 18.09                     |

**Table S4.** Photovoltaic data of T27:Y6 solar cells with different solvent vapor annealing. All data were obtained under illumination of AM 1.5G (100mW cm<sup>-2</sup>) light source.

| D:A   | condition                         | Voc (V) | PCE <sub>max</sub> (%) | FF (%) | Jsc (mA/cm <sup>2</sup> ) |
|-------|-----------------------------------|---------|------------------------|--------|---------------------------|
| 1.5:1 | CS <sub>2</sub> ,40s              | 0.883   | 12.00                  | 57.52  | 23.65                     |
|       | CF,40s                            | 0.848   | 12.03                  | 61.00  | 23.24                     |
|       | CB,50s                            | 0.846   | 14.99                  | 68.82  | 25.72                     |
|       | 120°C, 5min, CS <sub>2</sub> ,40s | 0.883   | 11.86                  | 55.30  | 24.28                     |
|       | 120°C, 5min, CF,40s               | 0.869   | 11.38                  | 53.78  | 24.35                     |
|       | 120°C, 5min, CB,50s               | 0.859   | 13.68                  | 62.56  | 25.47                     |

**Table S5.** Photovoltaic data of T27:Y6 solar cells with different solvent vapor annealing. All data were obtained under illumination of AM 1.5G (100mW cm<sup>-2</sup>) light source.

| D:A   | condition                     | Voc (V) | PCE <sub>max</sub> (%) | FF (%) | Jsc (mA/cm <sup>2</sup> ) |
|-------|-------------------------------|---------|------------------------|--------|---------------------------|
| 1.5:1 | CB,40S,120,2min               | 0.877   | 13.21                  | 57.06  | 26.40                     |
|       | CB,50S,120,2min               | 0.845   | 15.06                  | 67.46  | 26.42                     |
|       | CS <sub>2</sub> ,40S,120,2min | 0.871   | 14.74                  | 63.60  | 26.62                     |
|       | CS <sub>2</sub> ,50S,120,2min | 0.874   | 14.61                  | 63.50  | 26.31                     |
|       | THF,40S,120,2min              | 0.857   | 13.60                  | 60.53  | 26.21                     |
|       | THF,50S,120,2min              | 0.860   | 13.70                  | 59.75  | 26.67                     |
|       | DCM,40S,120,2min              | 0.881   | 11.79                  | 52.75  | 25.39                     |
|       | DCM,50S,120,2min              | 0.878   | 12.07                  | 53.68  | 25.62                     |

**Table S6.** Photovoltaic data of T27:Y6 solar cells with different solvent vapor annealing time. All data were obtained under illumination of AM 1.5G (100mW cm<sup>-2</sup>) light source

| D:A   | condition       | Voc (V) | PCE <sub>max</sub> (%) | FF (%) | Jsc (mA/cm <sup>2</sup> ) |
|-------|-----------------|---------|------------------------|--------|---------------------------|
| 1.5:1 | CB,50s,120,2min | 0.844   | 15.92                  | 70.79  | 26.65                     |
|       | CB,60s,120,2min | 0.841   | 16.50                  | 72.81  | 26.94                     |
|       | CB,70s,120,2min | 0.834   | 15.17                  | 69.85  | 26.01                     |

**Table S7.** Donor-Acceptor ratio dependence for T27:Y6 devices with the same conditions.

| <sup>A</sup> Ratio | Voc (V) | PCE <sub>max</sub> (%) | FF (%) | Jsc (mA/cm <sup>2</sup> ) |
|--------------------|---------|------------------------|--------|---------------------------|
| 1.3:1              | 0.833   | 15.40                  | 71.10  | 25.99                     |
| 1.4:1              | 0.833   | 16.01                  | 72.05  | 26.68                     |
| 1.5:1              | 0.838   | 16.77                  | 74.38  | 26.89                     |
| 1.6:1              | 0.835   | 16.41                  | 73.43  | 26.75                     |
| 1.7:1              | 0.837   | 16.07                  | 70.65  | 26.71                     |

**Table S8.** Photovoltaic parameters of thick-film all-small molecules with different active layer thickness.

| Active layer                       | Thickness [nm] | J <sub>sc</sub> [mA cm <sup>-2</sup> ] | Voc [V] | FF [%] | PCE[%] | Ref. |
|------------------------------------|----------------|----------------------------------------|---------|--------|--------|------|
| DR3TSBDT:PC <sub>71</sub> BM       | 280            | 15.82                                  | 0.88    | 65.3   | 9.05   | 3    |
| BTR: PC <sub>71</sub> BM           | 310            | 14.5                                   | 0.94    | 70     | 9.5    | 4    |
| BTR:NITI: PC <sub>71</sub> BM      | 300            | 19.5                                   | 0.94    | 73.83  | 13.63  | 5    |
| BTR:BTR-OH:<br>PC <sub>71</sub> BM | 300            | 14.62                                  | 0.93    | 74.2   | 10.14  | 6    |
| SM1-F:Y6                           | 250            | 21.9                                   | 0.85    | 64     | 11.9   | 7    |
| L2:Y6                              | 300            | 24.5                                   | 0.82    | 71.2   | 14.3   | 8    |
| HD-1:BYP-eC9                       | 350            | 27.25                                  | 0.811   | 67.52  | 14.92  | 9    |
| This Work                          | 300            | 27.21                                  | 0.812   | 68.02  | 15.03  |      |

**Table S9.** In-plane (IP) and out-of-plane (OOP) parameters extracted from the 2D GIWAXS of pristine films.

| Position<br><br>Sample |       | Out-of-plane        |               |                         |                      |                     |               |                         | In plane             |                     |               |                         |                      |                     |               |                         |                      |      |       |      |
|------------------------|-------|---------------------|---------------|-------------------------|----------------------|---------------------|---------------|-------------------------|----------------------|---------------------|---------------|-------------------------|----------------------|---------------------|---------------|-------------------------|----------------------|------|-------|------|
|                        |       | 010                 |               |                         |                      | h00                 |               |                         | h00                  |                     |               |                         | 010                  |                     |               |                         | 001                  |      |       |      |
|                        |       | q(Å <sup>-1</sup> ) | d-spacing (Å) | FWHM (Å <sup>-1</sup> ) | Coherence length (Å) | q(Å <sup>-1</sup> ) | d-spacing (Å) | FWHM (Å <sup>-1</sup> ) | Coherence length (Å) | q(Å <sup>-1</sup> ) | d-spacing (Å) | FWHM (Å <sup>-1</sup> ) | Coherence length (Å) | q(Å <sup>-1</sup> ) | d-spacing (Å) | FWHM (Å <sup>-1</sup> ) | Coherence length (Å) |      |       |      |
| T27                    | N/A   | N/A                 | N/A           | N/A                     | 0.318 (100)          | 19.8                | 0.037         | 151.9                   | 0.393                | 16.0                | 0.033         | 170.1                   | 1.778                | 3.5                 | 0.317         | 18.0                    | N/A                  | N/A  | N/A   | N/A  |
|                        |       |                     |               |                         | 0.615 (200)          | 10.2                | 0.136         | 41.7                    |                      |                     |               |                         |                      |                     |               |                         |                      |      |       |      |
|                        |       |                     |               |                         | 0.912 (300)          | 6.9                 | 0.248         | 22.9                    |                      |                     |               |                         |                      |                     |               |                         |                      |      |       |      |
| T26                    | N/A   | N/A                 | N/A           | N/A                     | 0.318 (100)          | 19.8                | 0.039         | 145.6                   | 0.371                | 16.9                | 0.023         | 242.7                   | 1.718                | 3.7                 | 0.231         | 24.7                    | N/A                  | N/A  | N/A   | N/A  |
|                        |       |                     |               |                         | 0.639 (200)          | 9.8                 | 0.068         | 83.1                    |                      |                     |               |                         |                      |                     |               |                         |                      |      |       |      |
|                        |       |                     |               |                         | 0.882 (300)          | 7.1                 | 0.146         | 38.8                    |                      |                     |               |                         |                      |                     |               |                         |                      |      |       |      |
| T25                    | 1.527 | 4.1                 | 0.289         | 19.7                    | 0.272 (100)          | 23.1                | 0.025         | 224.3                   | 0.371                | 16.9                | 0.023         | 246.9                   | 1.728                | 3.6                 | 0.215         | 26.6                    | N/A                  | N/A  | N/A   | N/A  |
|                        |       |                     |               |                         | 0.562 (200)          | 11.2                | 0.037         | 154.3                   |                      |                     |               |                         |                      |                     |               |                         |                      |      |       |      |
|                        |       |                     |               |                         | 0.839 (300)          | 7.5                 | 0.053         | 106.9                   |                      |                     |               |                         |                      |                     |               |                         |                      |      |       |      |
| Y6                     | 1.764 | 3.6                 | 0.244         | 23.4                    | N/A                  | N/A                 | N/A           | N/A                     | 0.357                | 17.6                | 0.130         | 43.5                    | N/A                  | N/A                 | N/A           | N/A                     | 0.486                | 12.9 | 0.133 | 42.5 |

**Table S10.** In-plane (IP) and out-of-plane (OOP) parameters extracted from the 2D GIWAXS of as cast blend films.

| Position<br>Sample | Out-of-plane           |                            |                            |                                   |                        |                            |                            |                                   | In plane               |                            |                            |                                   |                        |                            |                            |                                   |
|--------------------|------------------------|----------------------------|----------------------------|-----------------------------------|------------------------|----------------------------|----------------------------|-----------------------------------|------------------------|----------------------------|----------------------------|-----------------------------------|------------------------|----------------------------|----------------------------|-----------------------------------|
|                    | 010                    |                            |                            |                                   | 100                    |                            |                            |                                   | 100                    |                            |                            |                                   | 010                    |                            |                            |                                   |
|                    | q( $\text{\AA}^{-1}$ ) | d-spacing ( $\text{\AA}$ ) | FWHM ( $\text{\AA}^{-1}$ ) | Coherence length ( $\text{\AA}$ ) | q( $\text{\AA}^{-1}$ ) | d-spacing ( $\text{\AA}$ ) | FWHM ( $\text{\AA}^{-1}$ ) | Coherence length ( $\text{\AA}$ ) | q( $\text{\AA}^{-1}$ ) | d-spacing ( $\text{\AA}$ ) | FWHM ( $\text{\AA}^{-1}$ ) | Coherence length ( $\text{\AA}$ ) | q( $\text{\AA}^{-1}$ ) | d-spacing ( $\text{\AA}$ ) | FWHM ( $\text{\AA}^{-1}$ ) | Coherence length ( $\text{\AA}$ ) |
| T27:Y6             | 1.697                  | 3.7                        | 0.174                      | 32.9                              | N/A                    | N/A                        | N/A                        | N/A                               | 0.433                  | 14.5                       | 0.043                      | 131.5                             | N/A                    | N/A                        | N/A                        | N/A                               |
| T26:Y6             | 1.633                  | 3.8                        | 0.203                      | 28.1                              | 0.275                  | 22.9                       | 0.053                      | 106.3                             | 0.349                  | 18.0                       | 0.035                      | 160.4                             | N/A                    | N/A                        | N/A                        | N/A                               |
| T25:Y6             | 1.633                  | 3.8                        | 0.191                      | 30.0                              | 0.278                  | 22.6                       | 0.067                      | 84.1                              | 0.351                  | 17.9                       | 0.034                      | 164.7                             | N/A                    | N/A                        | N/A                        | N/A                               |

**Table S11.** The calculated C and S concentration in acceptor and donor.

| Elements | Donor |       |       | Acceptor |
|----------|-------|-------|-------|----------|
|          | T25   | T26   | T27   | Y6       |
| C        | 0.73  | 0.69  | 0.67  | 0.48     |
| S        | 0.052 | 0.076 | 0.075 | 0.029    |

## Reference

1. Xu, T. *et al.* Deciphering the Role of Side-Chain Engineering and Solvent Vapor Annealing for Binary All-Small-Molecule Organic Solar Cells. *Adv. Funct. Mater.* **33**, 2210549 (2022).
2. Xu, W. *et al.* Improved photovoltaic properties of copolymer donors by regulating

alkyl and alkylsilyl side chains. *Dyes and Pigments* **197**, 109842 (2022).

3. Zhang, Q. *et al.* Large active layer thickness toleration of high-efficiency small molecule solar cells. *J. Mater. Chem. A* **3**, 22274-22279 (2015).
4. Armin, A. *et al.* Reduced Recombination in High Efficiency Molecular Nematic Liquid Crystalline: Fullerene Solar Cells. *Adv. Energy Mater.* **6**, 1600939 (2016).
5. Zhou, Z. *et al.* High-efficiency small-molecule ternary solar cells with a hierarchical morphology enabled by synergizing fullerene and non-fullerene acceptors. *Nat. Energy* **3**, 952-959 (2018).
6. Tang, H. *et al.* Donor Derivative Incorporation: An Effective Strategy toward High Performance All-Small-Molecule Ternary Organic Solar Cells. *Adv. Sci. (Weinh)* **6**, 1901613 (2019).
7. Qiu, B. *et al.* Highly Efficient All-Small-Molecule Organic Solar Cells with Appropriate Active Layer Morphology by Side Chain Engineering of Donor Molecules and Thermal Annealing. *Adv. Mater.* **32**, e1908373 (2020).
8. Xu, T. *et al.* 15.8% efficiency binary all-small-molecule organic solar cells enabled by a selenophene substituted smatic liquid crystalline donor. *Energy & Environ. Sci.* **14**, 5366-5376 (2021).
9. Ma, K. *et al.* Modulation of Alkyl Chain Length on the Thiazole Side Group Enables Over 17% Efficiency in All-Small-Molecule Organic Solar Cells. *Adv.Funct. Mater.* **33**, 2214926 (2023).
